# Supplementary material for: Chemical properties, sources and size-resolved hygroscopicity of submicron black carbon-containing aerosols in urban Shanghai
Source: Copernicus journal article supplement (doi:10.5194/acp-2022-194), 2022-04-06
Supplement: Supplementary file 1 [file acp-2022-194-supplement.pdf]

1  
2  
3  
4  
5  
6  
7  
8  
9  
10  
11  
12  
13  
14  
15  
16  
17  
18  
19

*Supplement of*

**Chemical properties, sources and size-resolved  
hygroscopicity of submicron black carbon-containing  
aerosols in urban Shanghai**

Shijie Cui<sup>1</sup>, Dan Dan Huang<sup>2</sup>, Yangzhou Wu<sup>1,a</sup>, Junfeng Wang<sup>1</sup>, Fuzhen Shen<sup>1,b</sup>, Jiukun  
Xian<sup>1</sup>, Yunjiang Zhang<sup>1</sup>, Hongli Wang<sup>2</sup>, Cheng Huang<sup>2</sup>, Hong Liao<sup>1</sup>, Xinlei Ge<sup>1,\*</sup>

<sup>1</sup> Jiangsu Key Laboratory of Atmospheric Environment Monitoring and Pollution  
Control, Collaborative Innovation Center of Atmospheric Environment and Equipment  
Technology, School of Environmental Science and Engineering, Nanjing University of  
Information Science and Technology, Nanjing 210044, China

<sup>2</sup> Shanghai Academy of Environmental Sciences, Shanghai 200233, China

<sup>a</sup>now at: Department of Atmospheric Sciences, School of Earth Sciences, Zhejiang  
University, Hangzhou 310027, PR China

<sup>b</sup>now at: Department of Meteorology, University of Reading, Reading, RG6 6BX, UK

\*Corresponding author: Xinlei Ge (Email: caxinra@163.com)

*For Atmospheric Chemistry and Physics*

20 Table S1: Summary of the input parameters and uncertainties ( $\pm\sigma$ ) for the calculations  
 21 of hygroscopic parameters.

| Parameter               | average values | Uncertainty | Reference            |
|-------------------------|----------------|-------------|----------------------|
| O/C                     | 0.26           | $\pm 0.06$  | Measured from SP-AMS |
| $\kappa_{AN}$           | 0.58           | $\pm 0.01$  | Gysel et al., (2007) |
| $\kappa_{AS}$           | 0.48           | $\pm 0.01$  | Gysel et al., (2007) |
| $\kappa_{AHS}$          | 0.56           | $\pm 0.01$  | Gysel et al., (2007) |
| $\kappa_{OA} / (O / C)$ | 0.29           | $\pm 0.05$  | Chang et al.,(2010)  |
| $\kappa_{rBC-rich}$     | 0.09           | $\pm 0.02$  | Chang et al.,(2010)  |
| $\kappa_{HOA-rich}$     | 0.02           | $\pm 0.01$  | Chang et al.,(2010)  |
| $\kappa_{BBOA}$         | 0.03           | $\pm 0.01$  | Chang et al.,(2010)  |
| $\kappa_{WS-HOA}$       | 0.09           | $\pm 0.02$  | Chang et al.,(2010)  |
| $\kappa_{LO-OOA}$       | 0.07           | $\pm 0.01$  | Chang et al.,(2010)  |
| $\kappa_{MO-OOA}$       | 0.16           | $\pm 0.03$  | Chang et al.,(2010)  |
| $\kappa_{rBC}$          | 0              |             |                      |
| $\epsilon_{AN}$         | 0.192          | $\pm 0.083$ | Wu et al., (2016)    |
| $\epsilon_{AS}$         | 0.089          | $\pm 0.064$ | Wu et al., (2016)    |
| $\epsilon_{AHS}$        | 0.024          | $\pm 0.016$ | Wu et al., (2016)    |
| $\epsilon_{rBC-rich}$   | 0.089          | $\pm 0.043$ | Wu et al., (2016)    |
| $\epsilon_{HOA-rich}$   | 0.099          | $\pm 0.065$ | Wu et al., (2016)    |
| $\epsilon_{BBOA}$       | 0.044          | $\pm 0.034$ | Wu et al., (2016)    |
| $\epsilon_{WS-HOA}$     | 0.104          | $\pm 0.083$ | Wu et al., (2016)    |
| $\epsilon_{LO-OOA}$     | 0.071          | $\pm 0.046$ | Wu et al., (2016)    |
| $\epsilon_{MO-OOA}$     | 0.115          | $\pm 0.066$ | Wu et al., (2016)    |
| $\epsilon_{rBC}$        | 0.196          | $\pm 0.069$ | Wu et al., (2016)    |

23 Table S2: Summary of correlation coefficients between different *r*BCc OA factors and NR-PM<sub>1</sub> OA factors with the ship emission tracer (V) during  
 24 ship emission period (SEP) and non-ship emission period (Non-SEP)(see main text for details), respectively.

|        |          | <i>r</i> BCc OA |          |                  |       |        |                              |                              |                           | NR-PM <sub>1</sub> OA |      |                          |                         |
|--------|----------|-----------------|----------|------------------|-------|--------|------------------------------|------------------------------|---------------------------|-----------------------|------|--------------------------|-------------------------|
|        | <i>r</i> | <i>r</i> BC     | HOA-rich | <i>r</i> BC-rich | BBOA  | WS-HOA | LO-OOA <sub><i>r</i>BC</sub> | MO-OOA <sub><i>r</i>BC</sub> | HOA <sub><i>r</i>BC</sub> | HOA                   | COA  | LO-OOA <sub>NR-PM1</sub> | MOOOA <sub>NR-PM1</sub> |
| SEP    | V        | 0.69            | 0.69     | 0.28             | 0.55  | 0.72   | 0.22                         | -0.15                        | 0.71                      | 0.84                  | 0.08 | 0.64                     | 0.02                    |
| No-SEP | V        | -0.01           | 0.25     | 0.01             | -0.01 | -0.04  | -0.15                        | -0.62                        | 0.06                      | 0.19                  | 0.20 | -0.26                    | -0.77                   |

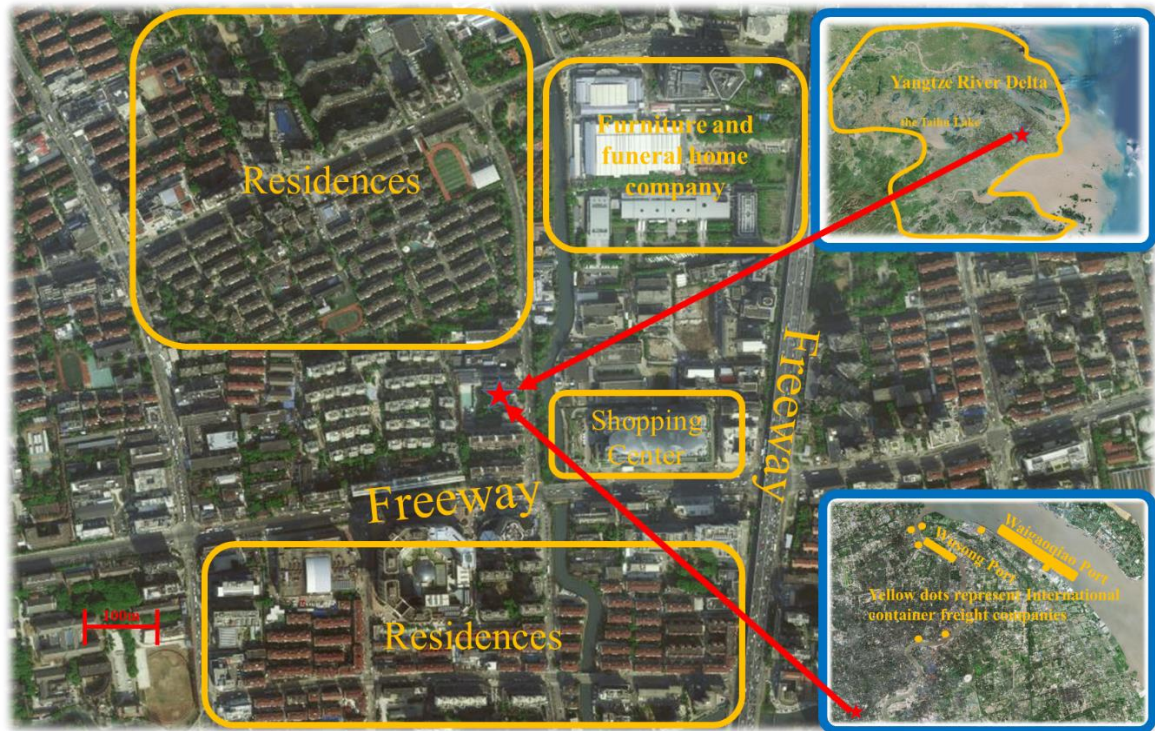

Figure S1: Location of the sampling site (red five-pointed star) and its surroundings. The bottom right inset figure shows the International Container Companies and the ports, and the top right inset figure shows the site location in the scale of Yangtze River Delta (Modified from © Google Map/image credit).

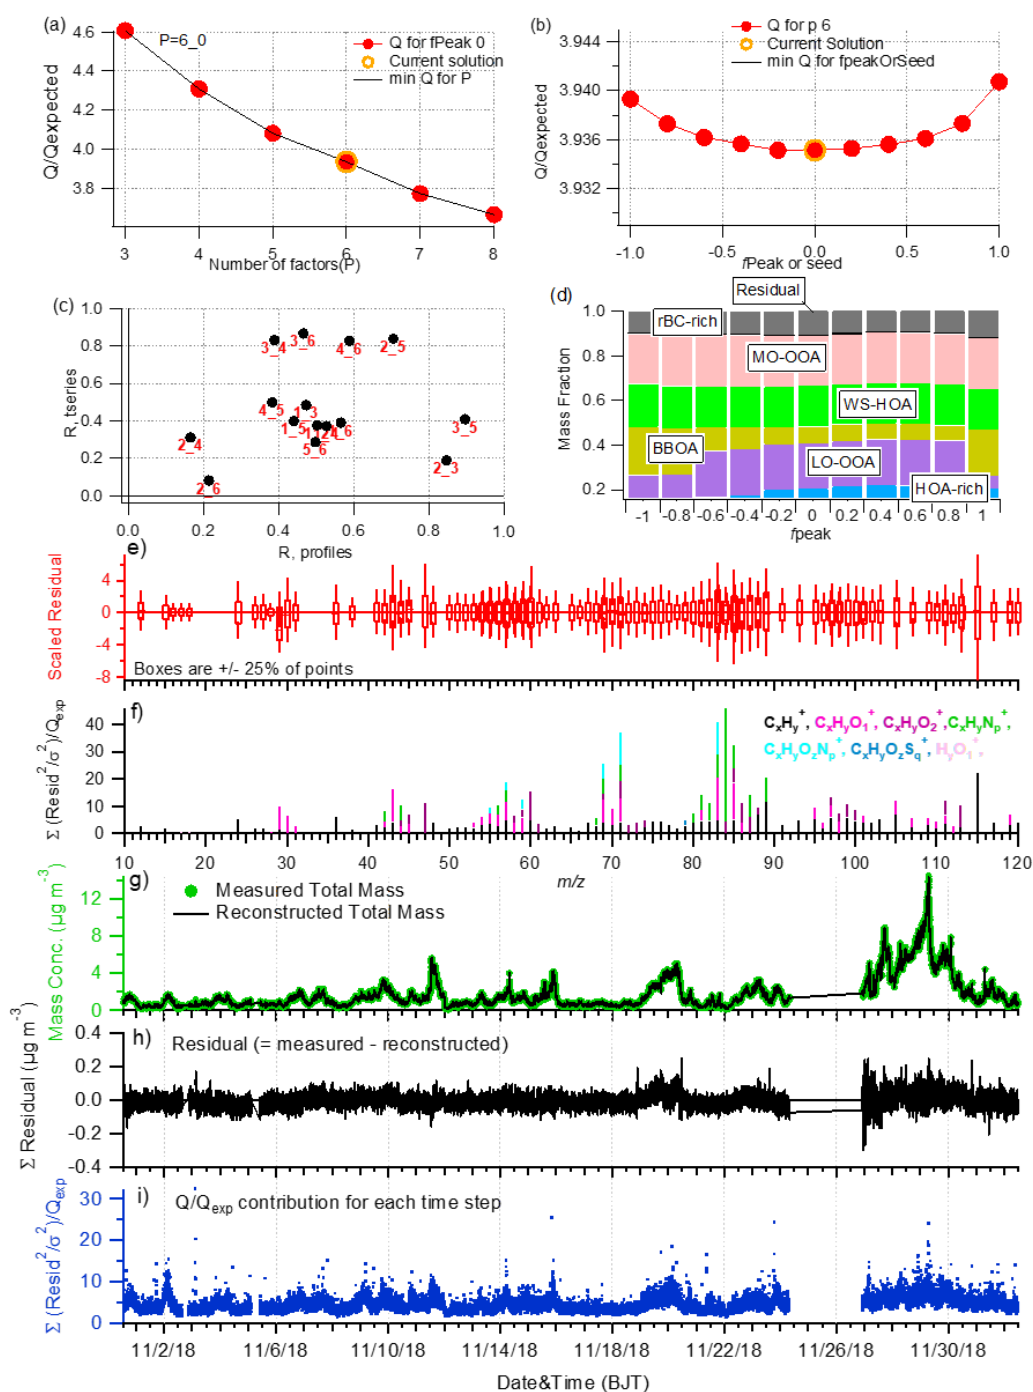

32

33 Figure S2. Summary of critical diagnostic plots of the PMF results for the 6-factor  
 34 solution of rBCc OA: (a)  $Q/Q_{exp}$  as a function of the number of factors (P from 3 to 8).  
 35 For the beat solution (6-factor): (b)  $Q/Q_{exp}$  as a function of  $f_{Peak}$ , (c) cross-correlations  
 36 of the time series and spectral profiles among the six factors, (d) fractions of OA factors  
 37 as a function of  $f_{Peak}$ , (e) the box and whiskers plot showing the distributions of scaled  
 38 residuals for each  $m/z$ , (f) the  $Q/Q_{exp}$  values for each ion, (g) time series of the measured  
 39 and the reconstructed OA mass loadings, (h) variations of the residuals of the fit, (i) the  
 40  $Q/Q_{exp}$  values for each time step.

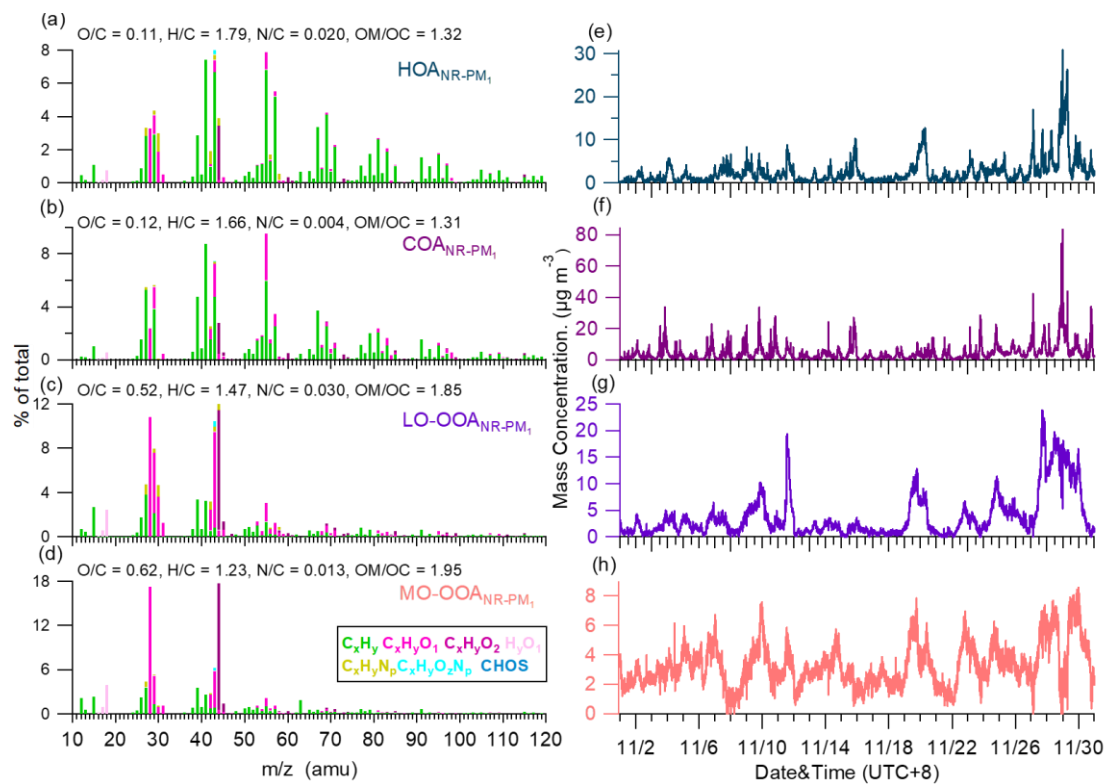

Figure S3. High resolution mass spectra (a-d) and time series (e-h) of the 4-factor solution resolved from PMF analysis of the NR-PM<sub>1</sub> OA.

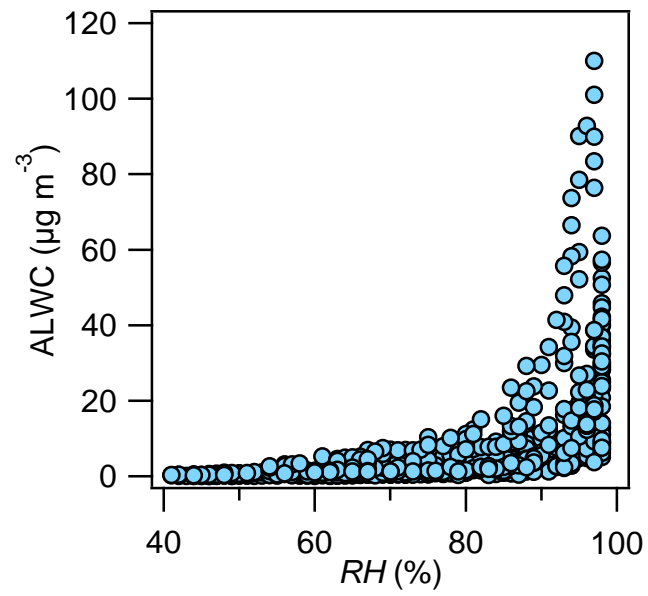

45

46 Figure S4. Calculated ALWC values versus RH for each time point (see main text for  
47 calculation details).

48

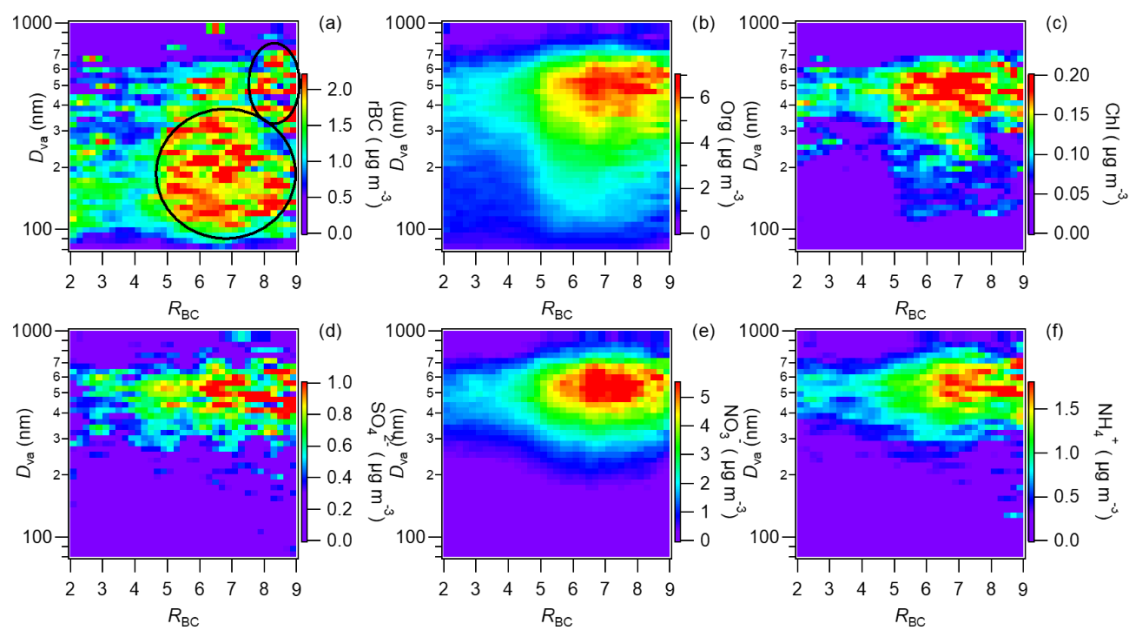

49

50 Figure S5. Image plots of size distributions of  $rBCc$  components as a function of  $R_{BC}$ .

51



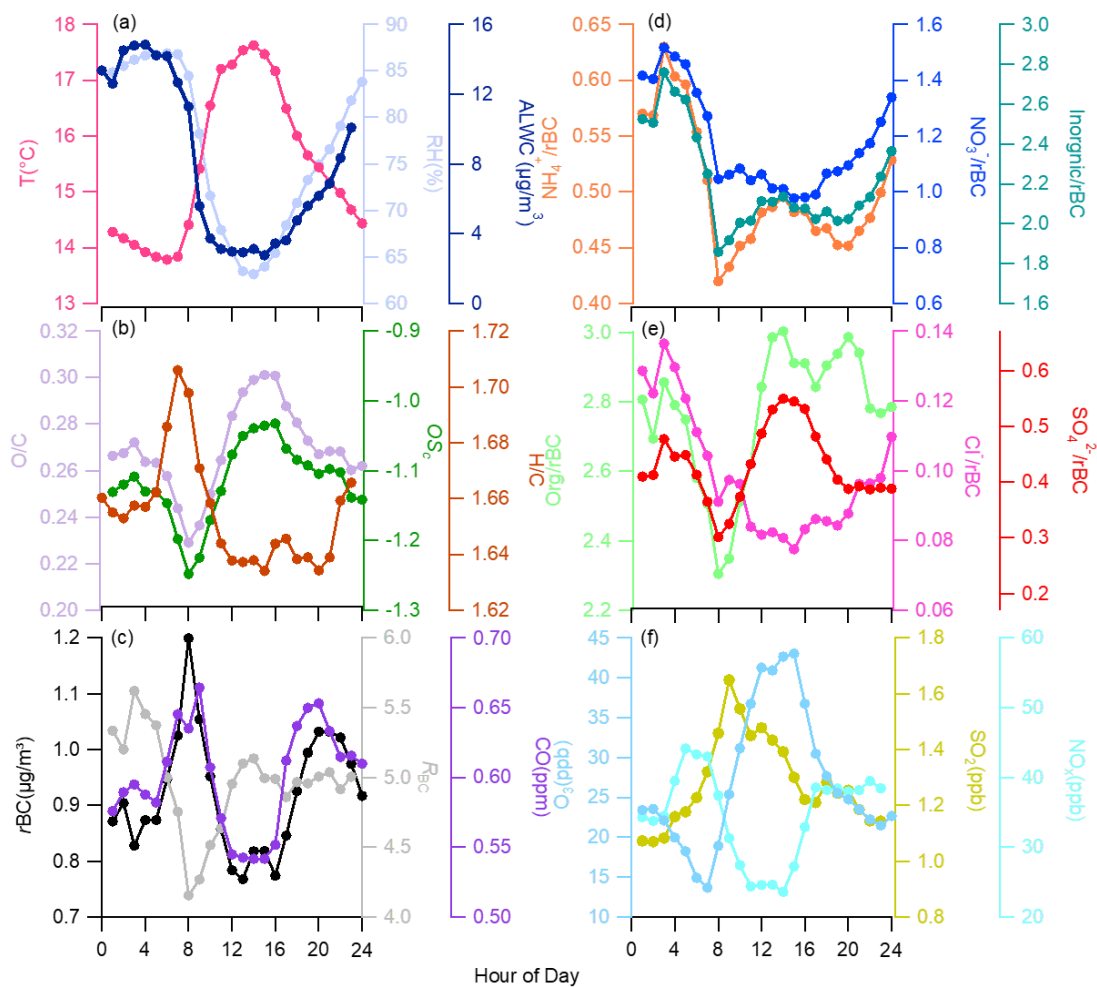

Figure S6. Campaign-average diurnal variations of (a)  $T$ , RH and ALWC, (b) O/C, H/C and oxidation state ( $\text{OS}_c = 2 \times \text{O/C} - \text{H/C}$ ), (c)  $R_{BC}$ ,  $r_{BC}$  and CO, (d)  $\text{NO}_3^-/r_{BC}$ ,  $\text{NH}_4^+/r_{BC}$  and inorganics/ $r_{BC}$  (inorganics =  $\text{NO}_3^- + \text{NH}_4^+ + \text{SO}_4^{2-} + \text{Cl}^-$ ), (e)  $\text{SO}_4^{2-}/r_{BC}$ ,  $\text{Cl}^-/r_{BC}$  and organics/ $r_{BC}$ , and (f) gaseous species ( $\text{O}_3$ ,  $\text{SO}_2$ ,  $\text{NO}_x$ ).

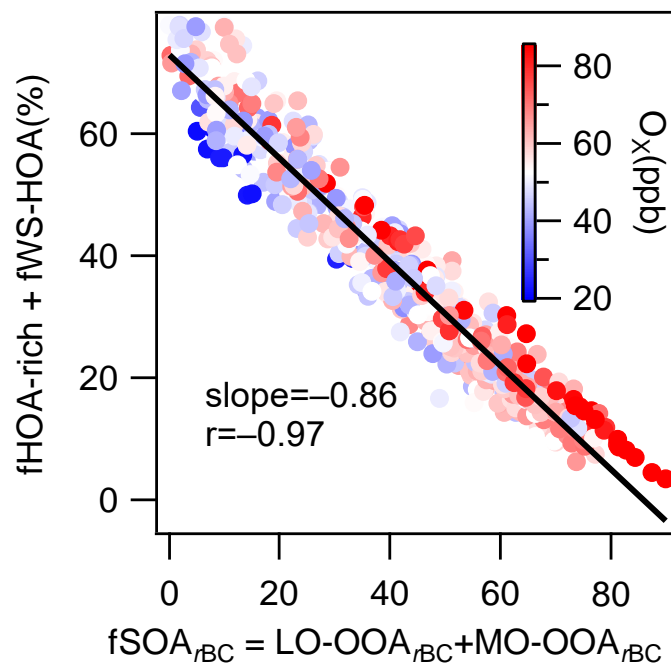

58

59 Figure S7. Relationship between the mass fraction (%) of the sum of HOA-rich and  
60 WS-HOA and the sum of LO-OOA<sub>rBC</sub> and MO-OOA<sub>rBC</sub> (colored by O<sub>x</sub>  
61 concentrations).

62

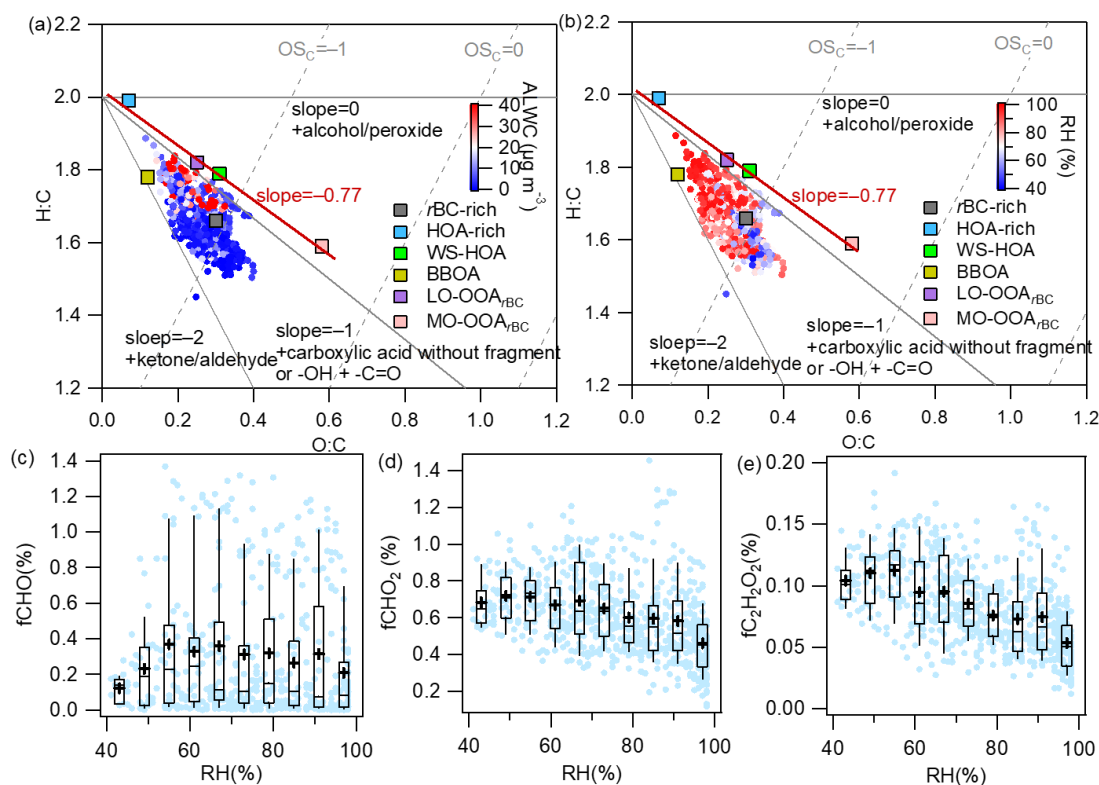

Figure S8. Van Krevelen diagram of H/C versus O/C ratios for all *rBCc* OA and the six factors colored by ALWC (a) and RH (b) (the red line is the fitted line of the four OA factors). (c-e) Mass fractions of selected oxygenated ion fragments as a function of RH (the whiskers above and below the boxes mark the 90% and 10% percentiles, respectively; the upper and lower edge of the boxes represent the 75% and 25% percentiles, respectively; and the lines and triangles inside the boxes denote the median and mean values, respectively).

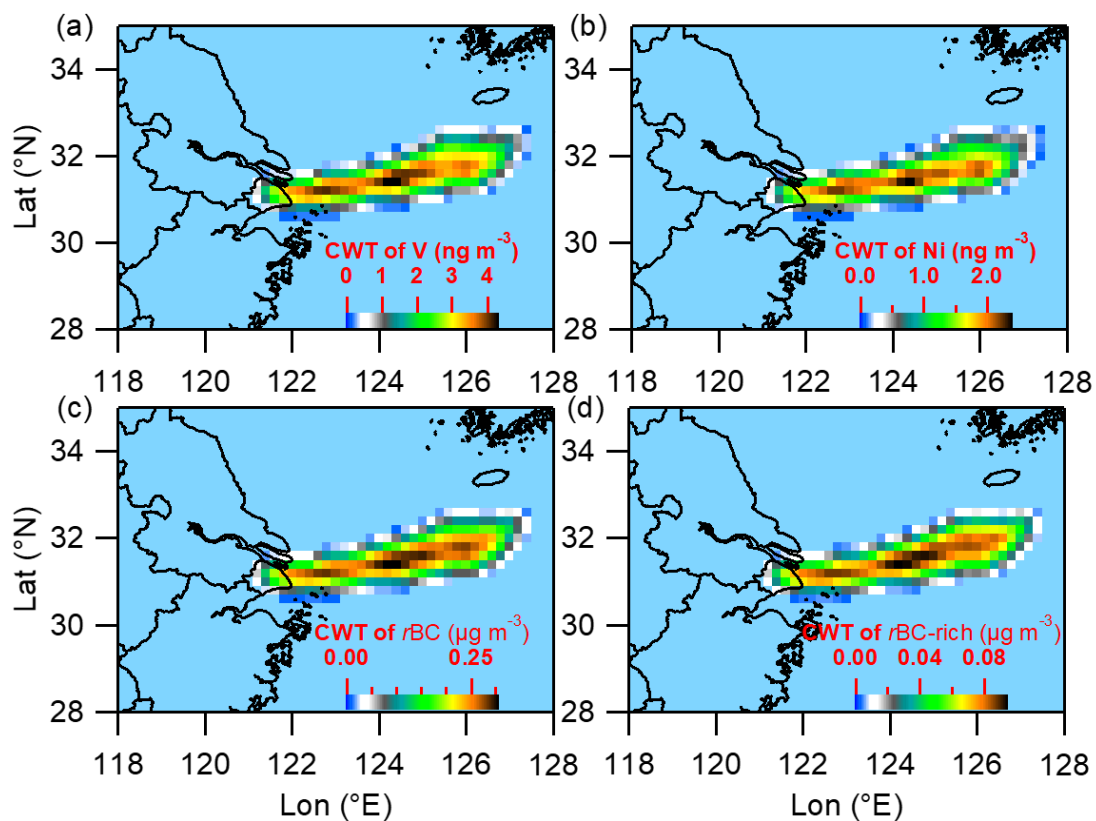

Figure S9. Concentration-weighted trajectories (CWT) of ship emission tracers of V (a) and Ni (b), and *r*BC (c) and *r*BC-rich OA factors (d) (the regions with high CWT values indicate potentially high concentrations of these species).

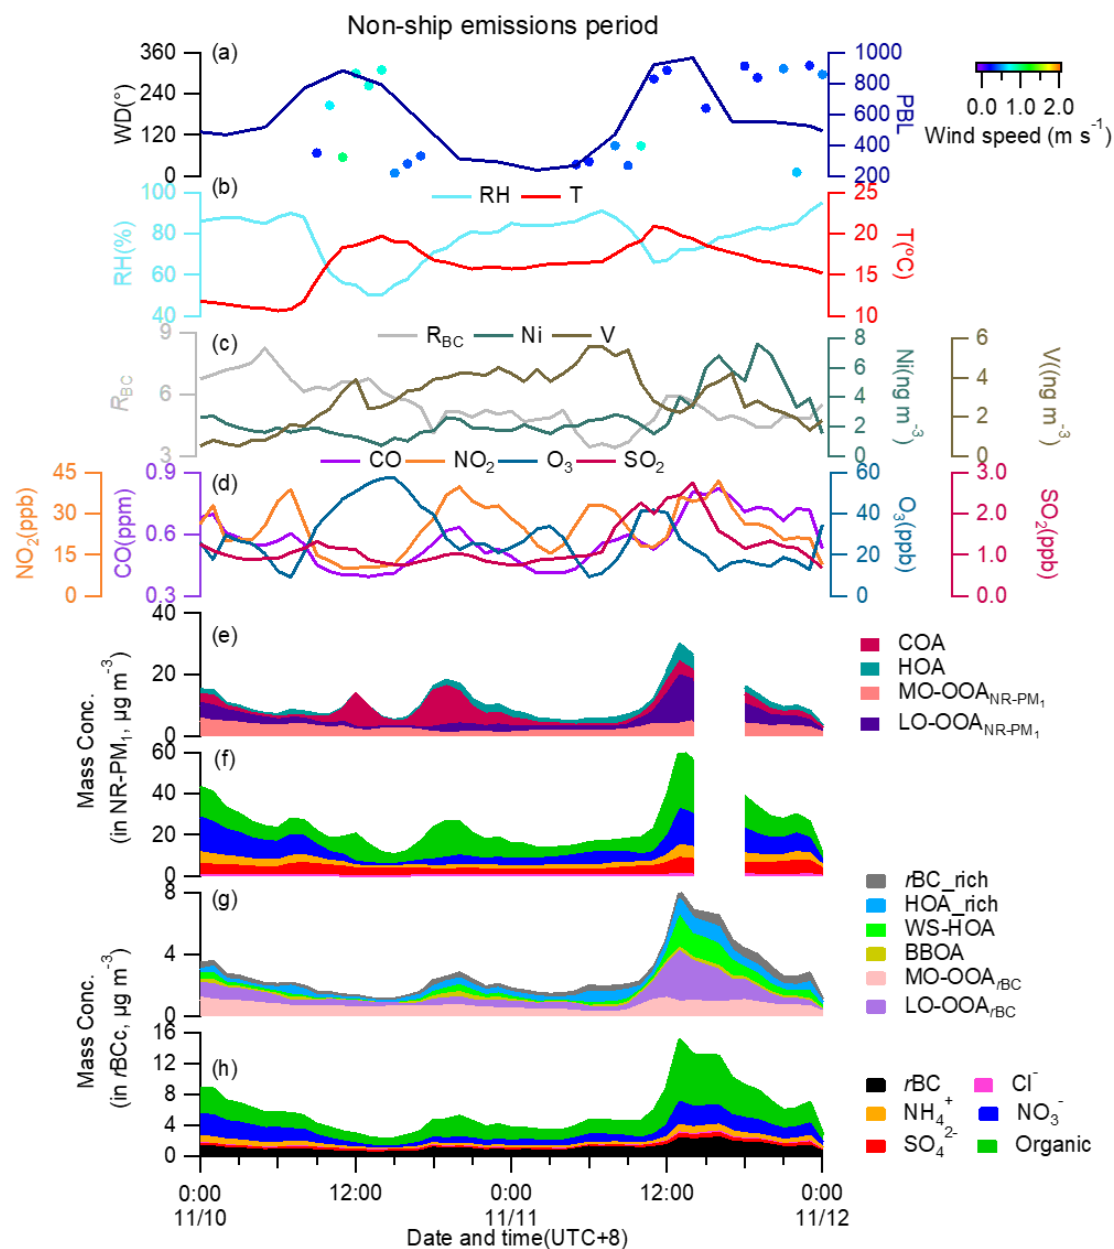

Figure S10. Time series of (a) wind direction (WD) colored by wind speed (WS), planetary boundary layer (PBL) height, (b) relative humidity (RH) and temperature (T), (c) mass concentrations of particle-phase Ni and V, and  $R_{BC}$ , (d) mass concentrations of CO, NO<sub>2</sub>, O<sub>3</sub>, SO<sub>2</sub>, stacked concentrations of (e) NR-PM<sub>1</sub> OA factors, (f) NR-PM<sub>1</sub> species, (g)  $rBCc$  OA factors, and (h)  $rBCc$  components during the non-ship emission period (Non-SEP).

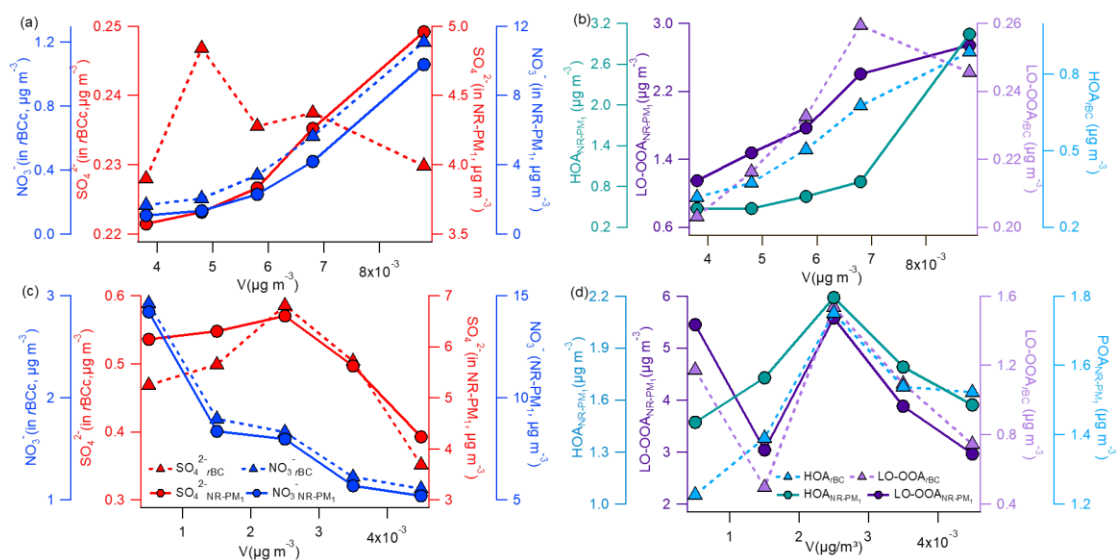

Figure S11. Mass concentrations of the  $r\text{BCc}$  nitrate, sulfate, OA factors in  $r\text{BCc}$  (dashed lines) and in  $\text{NR-PM}_1$  (solid lines) as a function of  $V$  concentrations during ship emission period (a, b) and non-ship emission period (c, d).

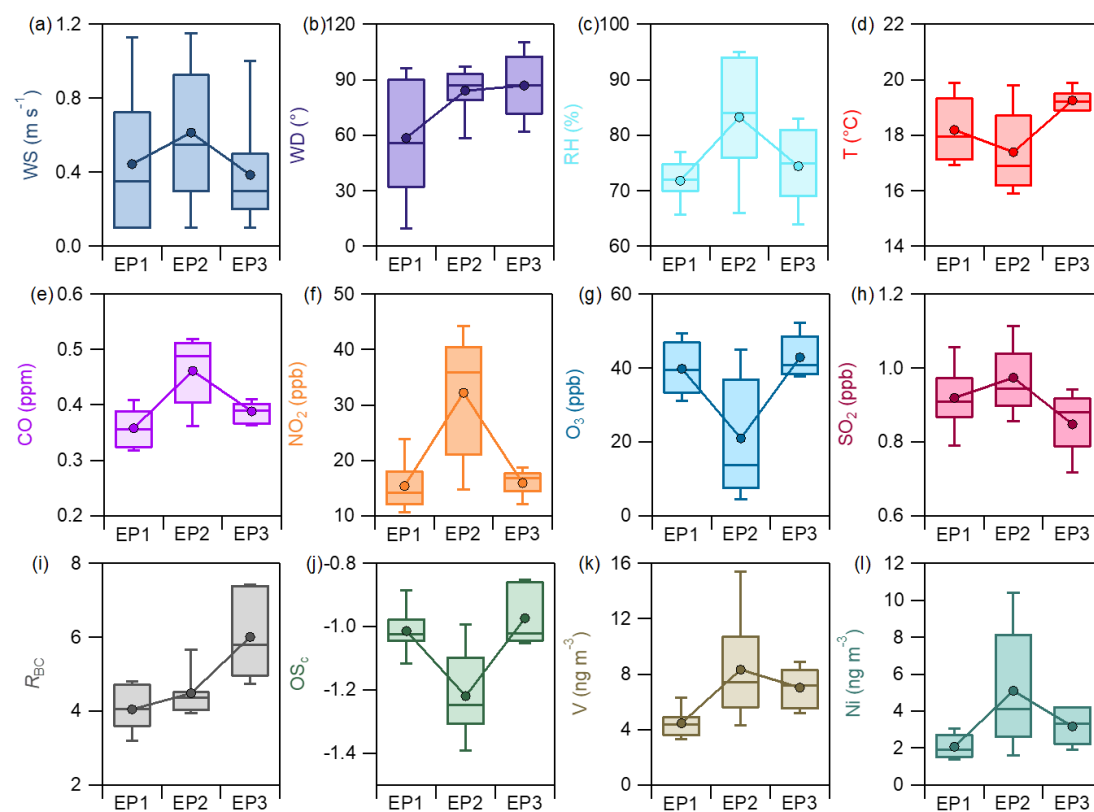

Figure S12. Box plots of meteorological parameters (a-d), gaseous pollutants (e-h),  $R_{\text{BC}}$  (i), OSc (j), and ship emission tracers V (k) and Ni (l) of the three episodes during ship emission period (SEP)(meanings of the boxes are the same as those described in Fig. S8).

## References

Chang, R. Y. W., Slowik, J. G., Shantz, N. C., Vlasenko, A., Liggio, J., Sjostedt, S. J., Leaitch, W. R., and Abbatt, J. P. D.: The hygroscopicity parameter ( $\kappa$ ) of ambient organic aerosol at a field site subject to biogenic and anthropogenic influences: relationship to degree of aerosol oxidation, *Atmos. Chem. Phys.*, 10, 5047-5064, <https://doi.org/10.5194/acp-10-5047-2010>, 2010.

Gysel, M., Crosier, J., Topping, D. O., Whitehead, J. D., Bower, K. N., Cubison, M. J., Williams, P. I., Flynn, M. J., McFiggans, G. B., and Coe, H.: Closure study between chemical composition and hygroscopic growth of aerosol particles during TORCH2, *Atmos. Chem. Phys.*, 7, 6131-6144, <https://doi.org/10.5194/acp-7-6131-2007>, 2007.

Wu, Z. J., Zheng, J., Shang, D. J., Du, Z. F., Wu, Y. S., Zeng, L. M., Wiedensohler, A., and Hu, M.: Particle hygroscopicity and its link to chemical composition in the urban atmosphere of Beijing, China, during summertime, *Atmos. Chem. Phys.*, 16, 1123-1138, <https://doi.org/10.5194/acp-16-1123-2016>, 2016.
